# Supplementary material
Source: HighWire-hosted journal article supplement (https://qualitysafety.bmj.com/highwire/filestream/162432/field_highwire_adjunct_files/0/bmjqs-2022-014983supp001_data_supplement.pdf)

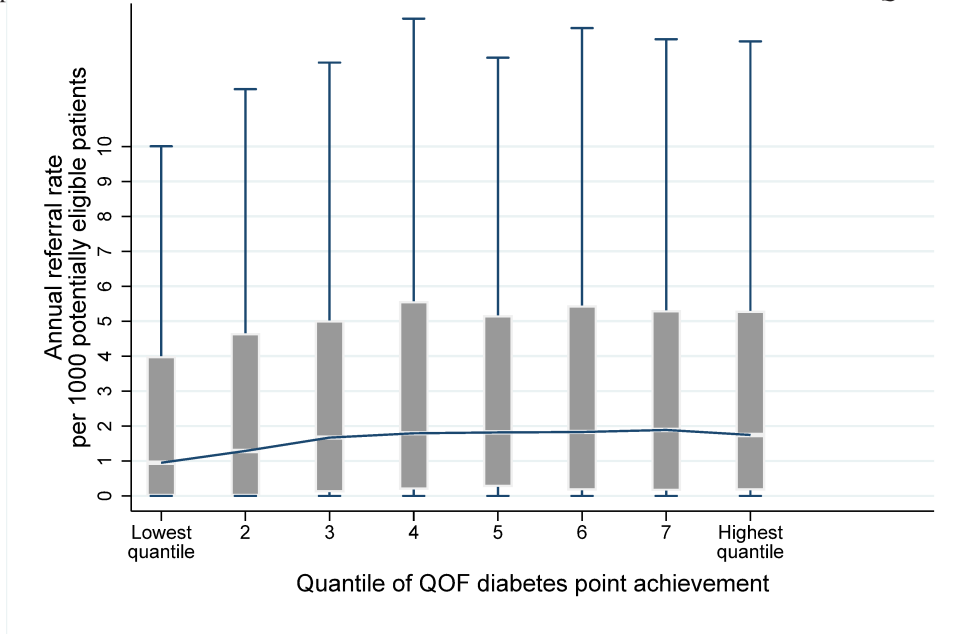

Supplement: bmjqs-2022-014983supp001_data_supplement.pdf [file bmjqs-2022-014983supp001_data_supplement.pdf]
